# Supplementary material for: Human Amniotic Membrane Preparation, Preservation and Clinical Application Using Various Techniques for the Treatment of Ophthalmic Dysfunctions
Source: Preprints.org preprint supplement (doi:10.20944/preprints201810.0321.v1), 2018-10-15
Supplement: Supplementary file 1 [file supplementary]

Manuscript ID: **vision-374945**

Author Information

Submitting Author

Md. Liakat Hossain

Corresponding Author

Md. Liakat Hossain

Author #1

Md. Arifuzzaman

E-Mail

arifbio366@gmail.com

Author #2

Md. Liakat Hossain

E-Mail

[liakat88ju@gmail.com](mailto:liakat88ju@gmail.com)

Author #3

Farzana Diba

E-Mail

farzana_diba@yahoo.com

Author #4

Ayesha Siddika

E-Mail

asiddika5209@gmail.com

Author #5

MH Adnan

E-Mail

adnanhasib9@gmail.com

Author #6

Naznin Akhtar

E-Mail

nazmbiocu@yahoo.com

Author #7

Md. Zahid Hasan

E-Mail

zahidhasan.bmb@gmail.com

Author #8

S.M. Asaduzzaman

E-Mail

sikderasad@yahoo.com
